# Supplementary material
Source: PubMed Central journal article supplement (PMC4152237)
Supplement: NIHMS617409-supplement-SuppFig1.pdf [file NIHMS617409-supplement-SuppFig1.pdf]

## Online Supporting Material

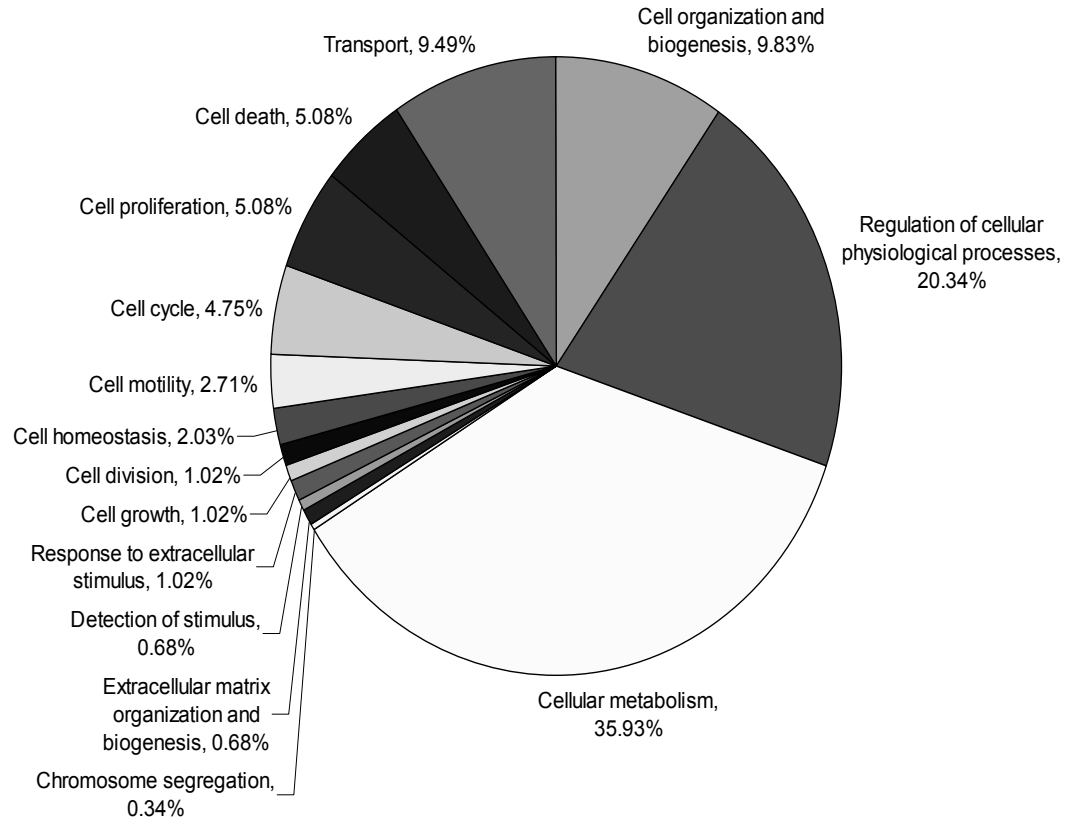

Supplemental Figure 1. Microarray analysis of ZnDF and ZnAD PrEC cells was performed using the Affymetrix HG-U133A gene chip. Genesifter was used to analyze microarray data. The pie chart represents ontology distribution of differentially expressed genes involved in different cellular physiological processes.
