# Supplementary material
Source: PubMed Central journal article supplement (PMC4152237)
Supplement: NIHMS617409-supplement-SuppFig2.pdf [file NIHMS617409-supplement-SuppFig2.pdf]

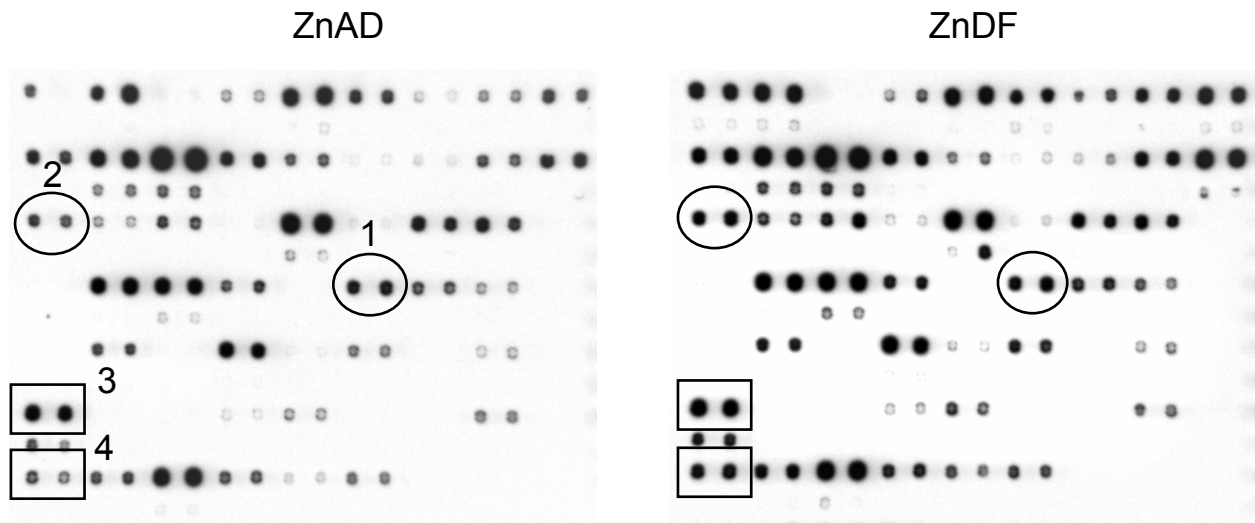

Supplemental Figure 2. Representative membranes from Panomics Protein/DNA Array I analysis of ZnAD and ZnDF PrEC cells. For a complete list of transcription factors with a statistically significant change in binding activity greater than 2-fold refer to Table 4. Each spot on the membrane represents the consensus sequence for a specific transcription factor or family of transcription factors. Several transcription factors with increased binding activity with ZnDF are noted (1. p53, 2. GATA binding protein, 3. Sp1 and 4. Thyroid hormone receptor (TR)).
