# Supplementary material
Source: PubMed Central journal article supplement (PMC4152237)
Supplement: NIHMS617409-supplement-SuppTable1.pdf [file NIHMS617409-supplement-SuppTable1.pdf]

Online Supporting Material

Supplemental Table 1. Primer sequences and annealing temperature used for qPCR analysis.

| <b>Gene</b>                                     |     | <b>Primer Sequence</b>     | <b>Annealing Temp</b> |
|-------------------------------------------------|-----|----------------------------|-----------------------|
| beta-actin                                      | fwd | TCTTCCAGCCTTCCTTCCTGGGCATG | 56°C                  |
|                                                 | rev | GCTCAGGAGGAGCAATGATCTTGATC |                       |
| metallothionein 1                               | fwd | TCCTGCAAGTGCAAAGAGTG       | 58 °C                 |
|                                                 | rev | CAGCTGCACTTCTCCGATG        |                       |
| ribosomal P2                                    | fwd | ACCGGCTCAACAAGGTTATC       | 52°C                  |
|                                                 | rev | TCTTTCTTCTCCTCTGCTGCAG     |                       |
| TP53                                            | fwd | ATCTACAAGCAGTCACAGCACATGAC | 52°C                  |
|                                                 | rev | TTGTAGTGGATGGTGGTACAGTCAGA |                       |
| tyrosine 3 monooxygenase                        | fwd | GATACGACGAAATGGTGGAGTC     | 52°C                  |
|                                                 | rev | CTCAGTCTCAACCATTTGCCGA     |                       |
| Calpain 6                                       | fwd | GCTTTGAGCTCTTCAAGGTGGAGATG | 66°C                  |
|                                                 | rev | ATGTCCAGAGTCAGTTCCTGAGCTG  |                       |
| NFkB2                                           | fwd | TCGTACAACCCAGGTCTGGATGGTA  | 66°C                  |
|                                                 | rev | TCTTGACAGTGGGATAGGTCTTTCGG |                       |
| Myeloid cell leukemia sequence 1 (BCL2-related) | fwd | CTGGAGATTATCTCTCGGTACC     | 56°C                  |
|                                                 | rev | AGTTTCCGAAGCATGCCTTGGA     |                       |
| BAX                                             | fwd | CTTCAGGGTTTCATCCAGGATCGAG  | 56°C                  |
|                                                 | rev | CATCCTCTGCAGCTCCATGTTACTG  |                       |
| GADD45                                          | fwd | GCTGGTGACGAATCCACATTCA     | 56°C                  |
|                                                 | rev | CATTCAGATGCCATCACCGTTCAG   |                       |
| Mdm2                                            | fwd | GCTTCTCTGTGAAAGAGCACAGGA   | 56°C                  |
|                                                 | rev | CAAGGTCCTTTTGATCACTCCCACC  |                       |
| IGF-BP3 (53)                                    | fwd | GGCCATGACTGAGGAAAGGA       | 56°C                  |
|                                                 | rev | CCTGACTTTGCCAGACCTTCTT     |                       |
| p21 (54)                                        | fwd | CAGACCAGCATGACAGATTTT      | 56°C                  |
|                                                 | rev | GCGGATTAGGGCTTCCTCTT       |                       |
