# Supplementary material
Source: PubMed Central journal article supplement (PMC4152237)
Supplement: NIHMS617409-supplement-SuppTable2.pdf [file NIHMS617409-supplement-SuppTable2.pdf]

Online Supporting Material

Supplemental Table 2: Genes significantly down-regulated in PrEC cells treated with ZnDF versus ZnAD media for 7 d.

| Ratio <sup>1</sup> | Gene Identifier | Gene Name                                                                                                                                                                                        | LocusLink | Gene ID  |
|--------------------|-----------------|--------------------------------------------------------------------------------------------------------------------------------------------------------------------------------------------------|-----------|----------|
| -2                 | NM_005538       | Inhibin, beta C                                                                                                                                                                                  | 3626      | INHBC    |
| -2.01              | W87901          | Small nuclear ribonucleoprotein polypeptide E                                                                                                                                                    | 6635      | SNRPE    |
| -2.02              | NM_004166       | Chemokine (C-C motif) ligand 15                                                                                                                                                                  | 6359      | CCL15    |
| -2.03              | NM_013954       | NADPH oxidase 1                                                                                                                                                                                  | 27035     | NOX1     |
| -2.04              | NM_017409       | Homeobox C10                                                                                                                                                                                     | 3226      | HOXC10   |
| -2.05              | BC005241        | MRE11 meiotic recombination 11 homolog A (S. cerevisiae)                                                                                                                                         | 4361      | MRE11A   |
| -2.07              | NM_000257       | Myosin, heavy chain 7, cardiac muscle, beta                                                                                                                                                      | 4625      | MYH7     |
| -2.08              | AF132811        | Immunoglobulin superfamily, member 4                                                                                                                                                             | 23705     | IGSF4    |
| -2.08              | NM_005666       | Complement factor H-related 2                                                                                                                                                                    | 3080      | CFHR2    |
| -2.08              | AW163148        | Myristoylated alanine-rich protein kinase C substrate                                                                                                                                            | 4082      | MARCKS   |
| -2.08              | NM_000749       | Golgi autoantigen, golgin subfamily a, 7                                                                                                                                                         | 51125     | GOLGA7   |
| -2.09              | AF015124        | Mitogen-activated protein kinase-activated protein kinase 5                                                                                                                                      | 8550      | MAPKAPK5 |
| -2.13              | NM_024947       | Polyhomeotic homolog 3 (Drosophila)                                                                                                                                                              | 80012     | PHC3     |
| -2.13              | AK024177        | Homo sapiens, clone IMAGE:3851018, mRNA                                                                                                                                                          | -         | -        |
| -2.15              | AI345238        | tb81b07.x1 NCI_CGAP_Lu26 Homo sapiens cDNA clone IMAGE:2060725 3 similar to gb:M10119 FERRITIN LIGHT CHAIN (HUMAN);, mRNA sequence.                                                              | -         | -        |
| -2.16              | NM_016511       | C-type lectin domain family 1, member A                                                                                                                                                          | 51267     | CLEC1A   |
| -2.17              | NM_002108       | Histidine ammonia-lyase                                                                                                                                                                          | 3034      | HAL      |
| -2.18              | NM_006914       | RAR-related orphan receptor B                                                                                                                                                                    | 6096      | RORB     |
| -2.18              | AL136823        | Bromodomain containing 8                                                                                                                                                                         | 10902     | BRD8     |
| -2.19              | NM_006581       | Fucosyltransferase 9 (alpha (1,3) fucosyltransferase)                                                                                                                                            | 10690     | FUT9     |
| -2.21              | AF061192        | Ectodysplasin A                                                                                                                                                                                  | 1896      | EDA      |
| -2.21              | NM_006394       | Regulated in glioma                                                                                                                                                                              | -         | -        |
| -2.23              | NM_007101       | Sarcosine dehydrogenase                                                                                                                                                                          | 1757      | SARDH    |
| -2.24              | BC005354        | Tetraspanin 4                                                                                                                                                                                    | 7106      | TSPAN4   |
| -2.26              | AY029208        | Collagen, type VI, alpha 2                                                                                                                                                                       | 1292      | COL6A2   |
| -2.26              | BC002635        | Colony stimulating factor 2 receptor, alpha, low-affinity (granulocyte-macrophage)                                                                                                               | 1438      | CSF2RA   |
| -2.27              | AF113008        | Ribosomal protein S20                                                                                                                                                                            | -         | -        |
| -2.27              | BC005319        | Glycophorin A (MNS blood group)                                                                                                                                                                  | 2993      | GYPA     |
| -2.28              | NM_016831       | Period homolog 3 (Drosophila)                                                                                                                                                                    | 8863      | PER3     |
| -2.29              | NM_000280       | Paired box gene 6 (aniridia, keratitis)                                                                                                                                                          | 5080      | PAX6     |
| -2.31              | AA102667        | zn73e05.s1 Stratagene NT2 neuronal precursor 937230 Homo sapiens cDNA clone IMAGE:563840 3 similar to contains Alu repetitive element;contains element MSR1 repetitive element ;, mRNA sequence. | -         | -        |

## Online Supporting Material

|       |           |                                                                                                                                 |        |              |
|-------|-----------|---------------------------------------------------------------------------------------------------------------------------------|--------|--------------|
| -2.32 | NM_000573 | Complement component (3b/4b) receptor 1 (Knops blood group)                                                                     | 1378   | CR1          |
| -2.32 | AK021640  | Serologically defined colon cancer antigen 8                                                                                    | 10806  | SDCCAG8      |
| -2.33 | AJ275469  | Homo sapiens partial IGVH3 gene for immunoglobulin heavy chain V region, case 2, cell E 172.                                    | -      | -            |
| -2.35 | NM_005039 | Proline-rich protein BstNI subfamily 1                                                                                          | 5542   | PRB1         |
| -2.36 | NM_017805 | Ras interacting protein 1                                                                                                       | 54922  | RASIP1       |
| -2.36 | NM_005427 | Tumor protein p73                                                                                                               | 7161   | TP73         |
| -2.38 | NM_004646 | Nephrosis 1, congenital, Finnish type (nephrin)                                                                                 | 4868   | NPHS1        |
| -2.39 | BC001161  | Zinc finger protein 174                                                                                                         | 7727   | ZNF174       |
| -2.41 | BC000603  | Ribosomal protein L38                                                                                                           | 6169   | RPL38        |
| -2.41 | H71805    | Myeloid cell leukemia sequence 1 (BCL2-related)                                                                                 | 4170   | MCL1         |
| -2.43 | AW188214  | Myosin, heavy chain 14                                                                                                          | 79784  | MYH14        |
| -2.43 | AI221950  | Leucine rich repeat neuronal 3                                                                                                  | 54674  | LRRN3        |
| -2.44 | S67788    | Adenomatosis polyposis coli                                                                                                     | 324    | APC          |
| -2.44 | AL031778  | SEE ALSO                                                                                                                        | -      | -            |
| -2.45 | NM_002234 | Potassium voltage-gated channel, shaker-related subfamily, member 5                                                             | 3741   | KCNA5        |
| -2.48 | AA417256  | DKFZP564C196 protein                                                                                                            | 284649 | DKFZP564C196 |
| -2.51 | AB017445  | X-ray repair complementing defective repair in Chinese hamster cells 4                                                          | 7518   | XRCC4        |
| -2.53 | NM_016566 | Pparl                                                                                                                           | -      | -            |
| -2.53 | NM_000873 | Intercellular adhesion molecule 2                                                                                               | 3384   | ICAM2        |
| -2.58 | NM_016519 | Ameloblastin (enamel matrix protein)                                                                                            | 258    | AMBN         |
| -2.6  | AA320764  | Ribosomal protein S10                                                                                                           | 6204   | RPS10        |
| -2.6  | U09609    | Nuclear factor of kappa light polypeptide gene enhancer in B-cells 2 (p49/p100) RNA polymerase I transcription factor RRN3-like | 4791   | NFKB2        |
| -2.6  | BC006441  | like                                                                                                                            | 94431  | LOC94431     |
| -2.61 | NM_001939 | Dystrophin related protein 2                                                                                                    | 1821   | DRP2         |
| -2.65 | NM_005253 | FOS-like antigen 2                                                                                                              | 2355   | FOSL2        |
| -2.66 | AF070588  | Hypothetical protein LOC55565                                                                                                   | 55565  | LOC55565     |
| -2.66 | BE877796  | Collagen, type VIII, alpha 1                                                                                                    | 1295   | COL8A1       |
| -2.7  | NM_022436 | ATP-binding cassette, sub-family G (WHITE), member 5 (sterolin 1)                                                               | 64240  | ABCG5        |
| -2.71 | NM_024749 | Vasohibin 2                                                                                                                     | 79805  | VASH2        |
| -2.74 | AW134812  | Transcribed locus, strongly similar to XP_508943.1 similar to polypeptide N-acetylgalactosaminyltransferase 8; protein-UDP a    | -      | -            |
| -2.74 | U34249    | Tripartite motif-containing 15                                                                                                  | 89870  | TRIM15       |
| -2.75 | NM_017616 | ankyrin repeat domain 25                                                                                                        | 25959  | -            |
| -2.77 | NM_004188 | Growth factor independent 1B (potential regulator of CDKN1A, translocated in CML)                                               | 8328   | GFI1B        |
| -2.78 | AL117663  | Transcription factor 3 (E2A immunoglobulin enhancer binding factors E12/E47)                                                    | 6929   | TCF3         |
| -2.78 | AI005043  | WAS/WASL interacting protein family, member 1                                                                                   | 7456   | WIPF1        |
| -2.78 | NM_006498 | Lectin, galactoside-binding, soluble, 2                                                                                         | 3957   | LGALS2       |

Online Supporting Material

|       |           |                                                               |        |           |
|-------|-----------|---------------------------------------------------------------|--------|-----------|
|       |           | (galectin 2)                                                  |        |           |
| -2.83 | AW303136  | Ribosomal protein L38                                         | 6169   | RPL38     |
| -2.83 | NM_024802 | Hypothetical protein FLJ21369                                 | -      | -         |
|       |           | Coagulation factor C homolog, cochlin                         |        |           |
| -2.86 | AA669336  | (Limulus polyphemus)                                          | 1690   | COCH      |
| -2.9  | AI435828  | Stanniocalcin 2                                               | 8614   | STC2      |
| -2.92 | U66584    | Crystallin, alpha A                                           | 1409   | CRYAA     |
| -2.93 | AK001727  | WW and C2 domain containing 1                                 | 23286  | WWC1      |
| -2.94 | NM_002962 | S100 calcium binding protein A5                               | 6276   | S100A5    |
|       |           | Killer cell immunoglobulin-like receptor, three               |        |           |
| -2.96 | AF262973  | domains, long cytoplasmic tail, 1                             | 3811   | KIR3DL1   |
| -3.03 | NM_003519 | Histone cluster 1, H2bl                                       | 8340   | HIST1H2BL |
| -3.04 | U31216    | Glutamate receptor, metabotropic 1                            | 2911   | GRM1      |
| -3.06 | NM_022159 | EGF-TM7-latrophilin-related protein                           | -      | -         |
| -3.12 | AK025174  | Gasdermin-like                                                | 55876  | GSDML     |
| -3.12 | AI126492  | Chromosome 4 open reading frame 9                             | 8602   | C4orf9    |
| -3.15 | AW408194  | Immunoglobulin kappa variable 1D-13                           | 28902  | IGKV1D-13 |
| -3.17 | NM_030975 | Keratin associated protein 9.9                                | -      | -         |
| -3.17 | BC005924  | Pregnancy specific beta-1-glycoprotein 1                      | 5669   | PSG1      |
| -3.18 | X60502    | Sialophorin (leukosialin, CD43)                               | 6693   | SPN       |
| -3.29 | NM_006198 | Purkinje cell protein 4                                       | 5121   | PCP4      |
| -3.45 | NM_004072 | Chemokine-like receptor 1                                     | 1240   | CMKLR1    |
| -3.46 | N25429    | High-mobility group 20B                                       | 10362  | HMG20B    |
| -3.49 | NM_005256 | Fanconi anemia, complementation group F                       | 2188   | FANCF     |
| -3.5  | NM_018196 | Trimethyllysine hydroxylase, epsilon                          | 55217  | TMLHE     |
| -3.51 | AL136572  | Zinc finger, MIZ-type containing 2                            | 83637  | ZMIZ2     |
| -3.51 | AL080180  | 3-hydroxyisobutyrate dehydrogenase                            | 11112  | HIBADH    |
|       |           | ATPase, Na <sup>+</sup> /K <sup>+</sup> transporting, alpha 3 |        |           |
| -3.54 | NM_000703 | polypeptide                                                   | 478    | -         |
| -3.55 | AL049925  | Pygopus homolog 1 (Drosophila)                                | 26108  | PYGO1     |
| -3.62 | D00943    | Myosin, heavy chain 7, cardiac muscle, beta                   | 4625   | MYH7      |
| -3.63 | U18549    | G protein-coupled receptor 6                                  | 2830   | -         |
|       |           | ChaC, cation transport regulator homolog 1                    |        |           |
| -3.63 | NM_024111 | (E. coli)                                                     | 79094  | CHAC1     |
| -3.68 | NM_000587 | Complement component 7                                        | 730    | C7        |
| -3.73 | D78132    | Ras homolog enriched in brain                                 | 6009   | RHEB      |
|       |           | Transcription factor 3 (E2A immunoglobulin                    |        |           |
| -3.77 | BE962186  | enhancer binding factors E12/E47)                             | 6929   | TCF3      |
| -3.79 | AI950380  | B-cell CLL/lymphoma 7A                                        | 605    | BCL7A     |
|       |           | Similar to myeloid/lymphoid or mixed-lineage                  |        |           |
| -3.81 | AB016898  | leukemia (trithorax homolog, Drosophila);                     | 653483 | LOC653483 |
|       |           | translocated to, 4                                            |        |           |
| -3.9  | N92920    | Chromosome 1 open reading frame 77                            | 26097  | C1orf77   |
| -3.91 | D60132    | Glutamate receptor, metabotropic 5                            | 2915   | GRM5      |
| -3.93 | AB023144  | Seizure related 6 homolog (mouse)-like                        | 23544  | SEZ6L     |
| -3.99 | NM_001739 | Carbonic anhydrase VA, mitochondrial                          | 763    | CA5A      |
|       |           | Ribosome binding protein 1 homolog 180kDa                     |        |           |
| -3.99 | BE646396  | (dog)                                                         | 6238   | RRBP1     |
| -4.02 | NM_000638 | Vitronectin                                                   | 7448   | VTN       |
| -4.05 | AI191118  | Peptidylprolyl isomerase A (cyclophilin A)                    | 5478   | PPIA      |
| -4.07 | AI200443  | Melanoma antigen family A, 10                                 | 4109   | MAGEA10   |

## Online Supporting Material

|        |           |                                                                                                                       |        |           |
|--------|-----------|-----------------------------------------------------------------------------------------------------------------------|--------|-----------|
| -4.11  | NM_022063 | Chromosome 10 open reading frame 84                                                                                   | 63877  | C10orf84  |
| -4.21  | NM_022783 | DEP domain containing 6                                                                                               | 64798  | DEPDC6    |
| -4.24  | NM_020482 | Four and a half LIM domains 5                                                                                         | 9457   | FHL5      |
| -4.24  | NM_001048 | Somatostatin                                                                                                          | 6750   | SST       |
| -4.3   | NM_021208 | chromosome 9 open reading frame 27                                                                                    | 58483  | -         |
| -4.32  | NM_019098 | Cyclic nucleotide gated channel beta 3                                                                                | 54714  | CNGB3     |
| -4.36  | D88214    | Myocilin, trabecular meshwork inducible glucocorticoid response                                                       | 4653   | MYOC      |
| -4.37  | AF113018  | DEAD (Asp-Glu-Ala-Asp) box polypeptide 6                                                                              | 1656   | DDX6      |
| -4.38  | NM_002309 | Leukemia inhibitory factor (cholinergic differentiation factor)                                                       | 3976   | LIF       |
| -4.45  | U08092    | Histamine N-methyltransferase                                                                                         | 3176   | HNMT      |
| -4.47  | NM_000059 | Breast cancer 2, early onset                                                                                          | 675    | BRCA2     |
| -4.58  | L38424    |                                                                                                                       | -      | -         |
| -4.67  | NM_014421 | Dickkopf homolog 2 ( <i>Xenopus laevis</i> )                                                                          | 27123  | DKK2      |
| -4.76  | U01134    | Fms-related tyrosine kinase 1 (vascular endothelial growth factor/vascular permeability factor receptor)              | 2321   | FLT1      |
| -4.78  | NM_000590 | Interleukin 9                                                                                                         | 3578   | IL9       |
| -4.91  | AA521034  | Hypothetical protein MGC61571                                                                                         | 152100 | MGC61571  |
| -4.92  | U11701    | LIM homeobox 2                                                                                                        | 9355   | -         |
| -4.94  | AK026910  | Ciliary rootlet coiled-coil, rootletin                                                                                | 9696   | CROCC     |
| -5.15  | Z25425    | NIMA (never in mitosis gene a)-related kinase 2                                                                       | 4751   | NEK2      |
| -5.15  | NM_016046 | Exosome component 1                                                                                                   | 51013  | EXOSC1    |
| -5.35  | BE312027  | Transcribed locus, weakly similar to XP_370196.1 protein MG06693.4 [Magnaporthe grisea 70-15]                         | -      | -         |
| -5.37  | NM_016236 | Alanine-glyoxylate aminotransferase (oxalosis I; hyperoxaluria I; glycolicaciduria; serine-pyruvate aminotransferase) | -      | -         |
| -5.47  | NM_002196 | Insulinoma-associated 1                                                                                               | 3642   | INSM1     |
| -5.57  | AK023446  | Amino adipate-semialdehyde synthase                                                                                   | 10157  | AASS      |
| -5.8   | BC001279  | Microfibrillar-associated protein 3-like                                                                              | 9848   | MFAP3L    |
| -5.89  | BG403790  | 602419627F1 NIH_MGC_93 Homo sapiens cDNA clone IMAGE:4526599 5, mRNA sequence.                                        | -      | -         |
| -5.9   | U76376    | Harakiri, BCL2 interacting protein (contains only BH3 domain)                                                         | 8739   | HRK       |
| -5.91  | J05158    | Carboxypeptidase N, polypeptide 2, 83kD                                                                               | 1370   | CPN2      |
| -6.02  | D00267    | putative; Homo sapiens pseudogene for cytochrome c-like protein, clone pHGC4E1.                                       | -      | -         |
| -6.24  | BE857772  | Ribosomal protein L37a                                                                                                | 6168   | RPL37A    |
| -6.69  | NM_014548 | Tropomodulin 2 (neuronal)                                                                                             | 29767  | TMOD2     |
| -6.86  | BC000023  | Ribosomal protein S19                                                                                                 | 6223   | RPS19     |
| -7.21  | NM_004795 | Klotho                                                                                                                | 9365   | KL        |
| -8.2   | M69039    | Complement component 1, q subcomponent binding protein                                                                | -      | -         |
| -8.81  | AL049037  | Syntaphilin                                                                                                           | 9751   | SNPH      |
| -10.83 | X89657    | Similar to a disintegrin and metalloprotease domain 3 (cyritestin)                                                    | 651370 | LOC651370 |

## Online Supporting Material

-14.09 BC006370 Inversin 27130 INVS  
<sup>1</sup>. Ratio calculated as  $-1/(ZnDF/ZnAD)$ .
