# Supplementary material
Source: PubMed Central journal article supplement (PMC4152237)
Supplement: NIHMS617409-supplement-SuppTable3.pdf [file NIHMS617409-supplement-SuppTable3.pdf]

Online Supporting Material

Supplemental Table 3: Genes significantly up-regulated in PrEC cells treated with ZnDF versus ZnAD media for 7 d.

| Ratio <sup>1</sup> | Gene Identifier | Gene Name                                                                                                                                  | LocusLink | Gene ID |
|--------------------|-----------------|--------------------------------------------------------------------------------------------------------------------------------------------|-----------|---------|
| 2                  | BC002327        | KIAA0699 protein                                                                                                                           | -         | -       |
| 2                  | NM_000937       | Polymerase (RNA) II (DNA directed) polypeptide A, 220kDa                                                                                   | 5430      | POLR2A  |
| 2.01               | NM_002610       | Pyruvate dehydrogenase kinase, isozyme 1                                                                                                   | 5163      | PDK1    |
| 2.01               | U18945          | Cyclic nucleotide gated channel beta 1                                                                                                     | 1258      | CNGB1   |
| 2.01               | U63542          | SCC-112 protein                                                                                                                            | 23244     | SCC-112 |
| 2.03               | NM_000962       | Prostaglandin-endoperoxide synthase 1 (prostaglandin G/H synthase and cyclooxygenase)                                                      | 5742      | PTGS1   |
| 2.03               | AI813758        | Collagen, type III, alpha 1 (Ehlers-Danlos syndrome type IV, autosomal dominant)                                                           | 1281      | COL3A1  |
| 2.04               | NM_000774       | Cytochrome P450, family 2, subfamily F, polypeptide 1                                                                                      | 1572      | CYP2F1  |
| 2.05               | NM_013445       | Glutamate decarboxylase 1 (brain, 67kDa)                                                                                                   | 2571      | GAD1    |
| 2.07               | NM_012198       | Grancalcin, EF-hand calcium binding protein                                                                                                | 25801     | GCA     |
| 2.07               | NM_002991       | Chemokine (C-C motif) ligand 24                                                                                                            | 6369      | CCL24   |
| 2.09               | AA988241        | RAB3A, member RAS oncogene family                                                                                                          | 5864      | RAB3A   |
| 2.09               | BF983406        | Heterogeneous nuclear ribonucleoprotein H1 (H)                                                                                             | 3187      | HNRPH1  |
| 2.1                | AK024677        | N-acylsphingosine amidohydrolase (acid ceramidase)-like                                                                                    | 27163     | ASAHL   |
| 2.11               | AF073745        | Phosphodiesterase 4A, cAMP-specific (phosphodiesterase E2 dunce homolog, Drosophila)                                                       | 5141      | PDE4A   |
| 2.15               | X72475          | Immunoglobulin kappa constant                                                                                                              | 3514      | IGKC    |
| 2.15               | AA215854        | Integrin, beta 1 (fibronectin receptor, beta polypeptide, antigen CD29 includes MDF2, MSK12)                                               | 3688      | ITGB1   |
| 2.17               | X16866          | Cytochrome P450, family 2, subfamily D, polypeptide 6                                                                                      | 1565      | CYP2D6  |
| 2.18               | U85978          | Human chloride channel protein (p64) pseudogene, partial cds.                                                                              | -         | -       |
| 2.18               | AF031137        | Natural cytotoxicity triggering receptor 3                                                                                                 | 259197    | NCR3    |
| 2.18               | AF231056        | AT rich interactive domain 1A (SWI-like)                                                                                                   | 8289      | ARID1A  |
| 2.18               | NM_017707       | Development and differentiation enhancing factor-like 1                                                                                    | 55616     | DDEFL1  |
| 2.2                | BE890314        | 601431767F1 NIH_MGC_72 Homo sapiens cDNA clone IMAGE:3916816 5, mRNA sequence.                                                             | -         | -       |
| 2.21               | AW237172        | Jumonji domain containing 2B                                                                                                               | 23030     | JMJD2B  |
| 2.21               | NM_012182       | Forkhead box B1                                                                                                                            | 27023     | FOXB1   |
| 2.23               | AJ275374        | in-frame rearrangement, stop codon in junction; Homo sapiens partial IGVH3 gene for immunoglobulin heavy chain V region, case 1, clone 19. | -         | -       |
| 2.23               | NM_025102       | Hypothetical protein FLJ21497                                                                                                              | -         | -       |
| 2.24               | AF047338        | Solute carrier family 12 (potassium/chloride transporters), member 4                                                                       | 6560      | SLC12A4 |
| 2.24               | AA126789        | Centrosomal protein 170kDa                                                                                                                 | 9859      | CEP170  |
| 2.24               | NM_002290       | Laminin, alpha 4                                                                                                                           | 3910      | LAMA4   |

## Online Supporting Material

|      |           |                                                                                                    |       |          |
|------|-----------|----------------------------------------------------------------------------------------------------|-------|----------|
| 2.25 | AF038194  | Cell division cycle 73, Paf1/RNA polymerase II complex component, homolog ( <i>S. cerevisiae</i> ) | 79577 | CDC73    |
| 2.26 | AF043244  | Nucleolar protein 3 (apoptosis repressor with CARD domain)                                         | 8996  | NOL3     |
| 2.26 | U80737    | Nuclear receptor coactivator 3                                                                     | -     | -        |
| 2.3  | NM_003541 | Histone cluster 1, H4i                                                                             | 8294  | HIST1H4I |
| 2.32 | NM_003441 | Zinc finger protein 141                                                                            | 7700  | ZNF141   |
| 2.32 | NM_019093 | UDP glucuronosyltransferase 1 family, polypeptide A1                                               | 54658 | UGT1A1   |
| 2.33 | NM_000782 | Cytochrome P450, family 24, subfamily A, polypeptide 1                                             | 1591  | CYP24A1  |
| 2.34 | U00956    | SEE ALSO                                                                                           | -     | -        |
| 2.34 | NM_017414 | Ubiquitin specific peptidase 18                                                                    | 11274 | USP18    |
| 2.37 | NM_002135 | Nuclear receptor subfamily 4, group A, member 1                                                    | 3164  | NR4A1    |
| 2.4  | NM_018644 | Beta-1,3-glucuronyltransferase 1 (glucuronosyltransferase P)                                       | 27087 | B3GAT1   |
| 2.42 | J03208    | Dihydrolipoamide branched chain transacylase E2                                                    | 1629  | DBT      |
| 2.43 | AU158818  | Transcribed locus                                                                                  | -     | -        |
| 2.48 | AI343459  | Cell division cycle 25 homolog A ( <i>S. cerevisiae</i> )                                          | 993   | CDC25A   |
| 2.48 | U28936    | Tyrosine 3-monooxygenase/tryptophan 5-monooxygenase activation protein, epsilon polypeptide        | 7531  | YWHAE    |
| 2.48 | AK024258  | HBS1-like ( <i>S. cerevisiae</i> )                                                                 | 10767 | HBS1L    |
| 2.5  | NM_000466 | Peroxisome biogenesis factor 1                                                                     | 5189  | PEX1     |
| 2.51 | M76477    | GM2 ganglioside activator                                                                          | 2760  | GM2A     |
| 2.52 | U94364    | Glycogenin 2                                                                                       | 8908  | GYG2     |
| 2.59 | NM_004951 | Epstein-Barr virus induced gene 2 (lymphocyte-specific G protein-coupled receptor)                 | 1880  | EBI2     |
| 2.61 | NM_024687 | Hypothetical protein FLJ23049                                                                      | 79740 | FLJ23049 |
| 2.63 | NM_018586 | Hypothetical protein PRO1584                                                                       | -     | -        |
| 2.63 | BE675435  | Kruppel-like factor 6                                                                              | 1316  | KLF6     |
| 2.64 | NM_000672 | Alcohol dehydrogenase 6 (class V)                                                                  | 130   | ADH6     |
| 2.67 | NM_003335 | Ubiquitin-activating enzyme E1-like                                                                | 7318  | UBE1L    |
| 2.7  | AF034102  | Solute carrier family 29 (nucleoside transporters), member 2                                       | 3177  | SLC29A2  |
| 2.7  | NM_002919 | Regulatory factor X, 3 (influences HLA class II expression)                                        | 5991  | RFX3     |
| 2.74 | NM_001609 | Acyl-Coenzyme A dehydrogenase, short/branched chain                                                | 36    | ACADSB   |
| 2.74 | AF072814  | Metal response element binding transcription factor 2                                              | 22823 | MTF2     |
| 2.76 | AF226990  | HLA-G histocompatibility antigen, class I, G                                                       | 3135  | HLA-G    |
| 2.81 | AB007923  | Phosphodiesterase 4D interacting protein (myomegalin)                                              | 9659  | PDE4DIP  |
| 2.83 | AL049987  | Small EDRK-rich factor 1A (telomeric)                                                              | 8293  | SERF1A   |
| 2.83 | AL078636  | MRNA full length insert cDNA clone EUROIMAGE 117929                                                | -     | -        |
| 2.85 | NM_021651 | PRO0457 protein                                                                                    | -     | -        |
| 2.85 | NM_018510 | Hypothetical protein PRO1866                                                                       | -     | -        |
| 2.85 | NM_001990 | Eyes absent homolog 3 ( <i>Drosophila</i> )                                                        | 2140  | EYA3     |
| 2.87 | AA707199  | Neurotrophic tyrosine kinase, receptor, type 2                                                     | 4915  | NTRK2    |
| 2.91 | NM_022578 | chorionic somatomammotropin hormone-like 1                                                         | 1444  | -        |

## Online Supporting Material

|      |           |                                                                                                            |        |           |
|------|-----------|------------------------------------------------------------------------------------------------------------|--------|-----------|
| 2.93 | U84569    | Chromosome 21 open reading frame 2                                                                         | 755    | C21orf2   |
| 2.95 | AL096842  | Mitochondrial tumor suppressor 1                                                                           | 57509  | MTUS1     |
| 2.96 | AI923972  | Tetratricopeptide repeat domain 22                                                                         | 55001  | TTC22     |
| 2.96 | AV686235  | Mannan-binding lectin serine peptidase 1 (C4/C2 activating component of Ra-reactive factor)                | 5648   | MASP1     |
| 2.97 | NM_001407 | Cadherin, EGF LAG seven-pass G-type receptor 3 (flamingo homolog, Drosophila)                              | 1951   | CELSR3    |
| 3.02 | NM_002149 | Hippocalcin-like 1                                                                                         | 3241   | HPCAL1    |
| 3.07 | NM_017975 | Zwilch, kinetochore associated, homolog (Drosophila)                                                       | 55055  | ZWILCH    |
| 3.09 | NM_003153 | Signal transducer and activator of transcription 6, interleukin-4 induced                                  | 6778   | STAT6     |
| 3.1  | NM_017986 | G protein-coupled receptor 172B                                                                            | 55065  | GPR172B   |
| 3.18 | AA845710  | Breakpoint cluster region                                                                                  | 613    | BCR       |
| 3.25 | NM_000872 | 5-hydroxytryptamine (serotonin) receptor 7 (adenylate cyclase-coupled)                                     | 3363   | HTR7      |
| 3.27 | AB002361  | KIAA0363 protein                                                                                           | 23148  | KIAA0363  |
| 3.39 | AI193899  | SMAD family member 6                                                                                       | 4091   | SMAD6     |
| 3.4  | AW170602  | Regulator of G-protein signalling 12                                                                       | 6002   | RGS12     |
| 3.41 | AB033088  | Spectrin repeat containing, nuclear envelope 1                                                             | 23345  | SYNE1     |
| 3.44 | NM_002725 | Proline/arginine-rich end leucine-rich repeat protein                                                      | 5549   | PRELP     |
| 3.46 | L08599    | Cadherin 1, type 1, E-cadherin (epithelial)                                                                | 999    | CDH1      |
| 3.46 | NM_017643 | Mbt domain containing 1                                                                                    | 54799  | MBTD1     |
| 3.49 | NM_014289 | Calpain 6                                                                                                  | 827    | CAPN6     |
| 3.5  | NM_007198 | Proline synthetase co-transcribed homolog (bacterial)                                                      | 11212  | PROSC     |
| 3.51 | L37033    | FK506 binding protein 8, 38kDa                                                                             | 23770  | -         |
| 3.52 | NM_005417 | V-src sarcoma (Schmidt-Ruppin A-2) viral oncogene homolog (avian)                                          | 6714   | SRC       |
| 3.52 | H49382    | Hypothetical gene supported by BC041875; BX648984                                                          | 400642 | LOC400642 |
| 3.62 | AA457021  | BCL2-associated athanogene 5                                                                               | 9529   | BAG5      |
| 3.65 | NM_024803 | Tubulin, alpha-like 3                                                                                      | 79861  | TUBAL3    |
| 3.65 | BE901081  | 601674431F1 NIH_MGC_21 Homo sapiens cDNA clone IMAGE:3957319 5, mRNA sequence.                             | -      | -         |
| 3.67 | AA731709  | Olfactory receptor, family 2, subfamily A, member 9 pseudogene                                             | 441295 | OR2A9P    |
| 3.68 | U02569    | Adrenergic, alpha-1A-, receptor                                                                            | 148    | ADRA1A    |
| 3.69 | AF090895  | CDK5 regulatory subunit associated protein 1-like 1                                                        | 54901  | CDKAL1    |
| 3.72 | X55503    | metallothionein (MT)-like gene; H.sapiens pseudogene for metallothionein and AG/CT repetitive element.     | -      | -         |
| 3.72 | AA218868  | zr01g01.s1 Stratagene NT2 neuronal precursor 937230 Homo sapiens cDNA clone IMAGE:650256 3, mRNA sequence. | -      | -         |
| 3.74 | NM_000618 | Insulin-like growth factor 1 (somatomedin C)                                                               | 3479   | IGF1      |
| 3.8  | U58331    | Sarcoglycan, delta (35kDa dystrophin-associated glycoprotein)                                              | 6444   | SGCD      |
| 3.81 | NM_018048 | Mago-nashi homolog 2                                                                                       | 55110  | FLJ10292  |
| 3.83 | AB028239  | Homo sapiens pseudogene for necdin.                                                                        | -      | -         |
| 3.84 | NM_001240 | Cyclin T1                                                                                                  | 904    | CCNT1     |

## Online Supporting Material

|       |           |                                                                                   |        |           |
|-------|-----------|-----------------------------------------------------------------------------------|--------|-----------|
| 3.84  | NM_000850 | Glutathione S-transferase M4                                                      | 2948   | GSTM4     |
| 3.84  | U97145    | GDNF family receptor alpha 2                                                      | 2675   | GFRA2     |
| 3.86  | NM_003669 | inactivation escape 1                                                             | 8552   | -         |
| 3.86  | AF130071  | SEE ALSO                                                                          | -      | -         |
| 3.94  | AK001118  | Ubiquitin protein ligase E3 component n-recognin 2                                | 23304  | UBR2      |
| 4.1   | NM_024884 | L-2-hydroxyglutarate dehydrogenase                                                | 79944  | L2HGDH    |
| 4.18  | AF070670  | Protein phosphatase 1A (formerly 2C), magnesium-dependent, alpha isoform          | 5494   | PPM1A     |
| 4.27  | AA243659  | Family with sequence similarity 49, member A                                      | 81553  | FAM49A    |
| 4.28  | AF022048  | Killer cell immunoglobulin-like receptor, three domains, long cytoplasmic tail, 1 | 3811   | KIR3DL1   |
| 4.36  | NM_003969 | Ubiquitin-conjugating enzyme E2M (UBC12 homolog, yeast)                           | 9040   | UBE2M     |
| 4.41  | AJ243936  | Ring finger protein 5                                                             | 6048   | RNF5      |
| 4.46  | NM_025120 | Hypothetical protein FLJ13480                                                     | -      | -         |
| 4.47  | X96666    | Y box binding protein 1                                                           | 4904   | -         |
| 4.55  | NM_016134 | Plasma glutamate carboxypeptidase                                                 | 10404  | PGCP      |
| 4.56  | AL049988  | Inositol 1,4,5-triphosphate receptor, type 2                                      | 3709   | ITPR2     |
| 4.59  | NM_005692 | ATP-binding cassette, sub-family F (GCN20), member 2                              | 10061  | ABCF2     |
| 4.64  | AU147166  | Phosphoinositide-3-kinase, catalytic, alpha polypeptide                           | 5290   | PIK3CA    |
| 4.66  | AC002550  |                                                                                   | -      | -         |
| 4.74  | BE552409  | FXDY domain containing ion transport regulator 5                                  | 53827  | FXDY5     |
| 4.75  | NM_022136 | SAM domain, SH3 domain and nuclear localization signals 1                         | 64092  | SAMSN1    |
| 4.83  | K03199    | Tumor protein p53 (Li-Fraumeni syndrome)                                          | 7157   | TP53      |
| 4.98  | NM_017848 | Family with sequence similarity 120C                                              | 54954  | FAM120C   |
| 5.03  | BF574664  | Superkiller viralicidic activity 2-like 2 ( <i>S. cerevisiae</i> )                | 23517  | SKIV2L2   |
| 5.03  | AI979087  | Tetraspanin 4                                                                     | 7106   | TSPAN4    |
| 5.08  | NM_005930 | CTAGE family, member 5                                                            | 4253   | CTAGE5    |
| 5.12  | NM_015978 | TNNI3 interacting kinase                                                          | 51086  | TNNI3K    |
| 5.23  | AW589975  | Sin3A-associated protein, 30kDa                                                   | 8819   | SAP30     |
| 5.32  | NM_000780 | Cytochrome P450, family 7, subfamily A, polypeptide 1                             | 1581   | CYP7A1    |
| 6.26  | AI825798  | Rap2-binding protein 9                                                            | 154661 | RPIB9     |
| 6.34  | NM_001829 | Chloride channel 3                                                                | 1182   | CLCN3     |
| 6.44  | NM_022444 | Solute carrier family 13 (sodium/sulfate symporters), member 1                    | 6561   | SLC13A1   |
| 6.78  | U79301    | Hypothetical protein LOC728759                                                    | 728759 | LOC728759 |
| 7.35  | X79990    | Runt-related transcription factor 1; translocated to, 1 (cyclin D-related)        | 862    | RUNX1T1   |
| 8.02  | AF196478  | Annexin A10                                                                       | 11199  | ANXA10    |
| 9.92  | NM_005966 | NGFI-A binding protein 1 (EGR1 binding protein 1)                                 | 4664   | NAB1      |
| 11.95 | NM_017774 | CDK5 regulatory subunit associated protein 1-like 1                               | 54901  | CDKAL1    |

<sup>1</sup>. Ratio calculated as zinc deficient/zinc adequate.
